# Supplementary material for: Cortical networks of parkinsonian gait: a metabolic and functional connectivity study
Source: bioRxiv or medRxiv preprint supplement (doi:10.1101/2023.10.09.23296653), 2024-05-10
Supplement: Supplementary file [file media-1.pdf]

Supplementary Material

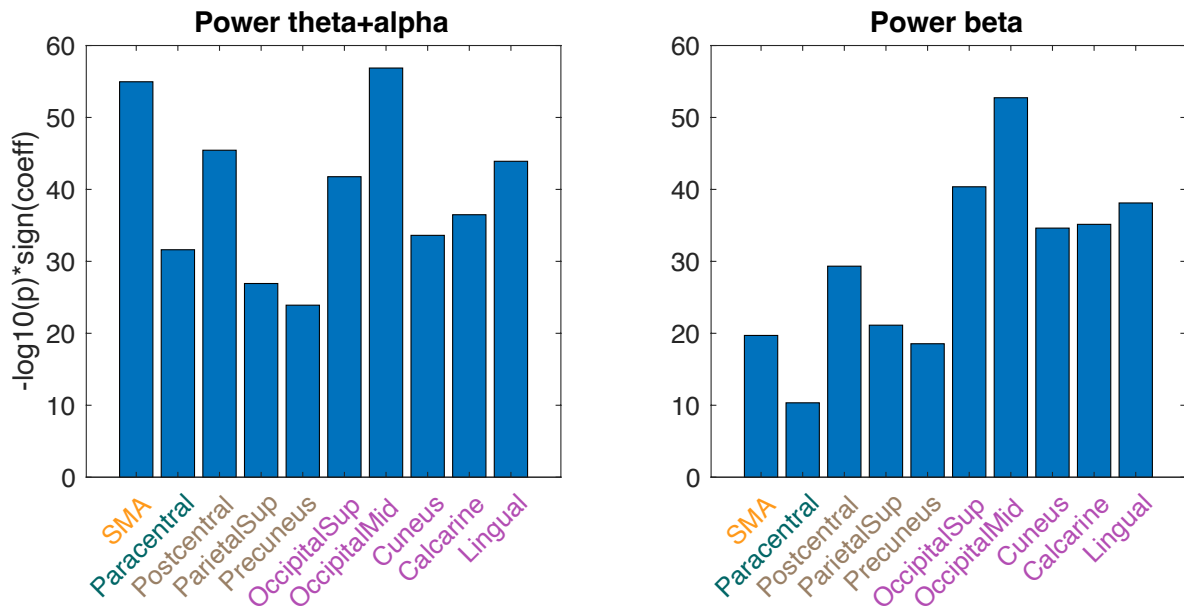

**Figure S1. Comparison of EEG power between resting and walking conditions in the theta-alpha and beta bands.** We show  $\log_{10} p$ -values, thus values below -2 and above 2 would indicate significance at alpha level 0.01. Signed  $\log_{10} p$ -values that were not significant after FDR correction are set to zero.

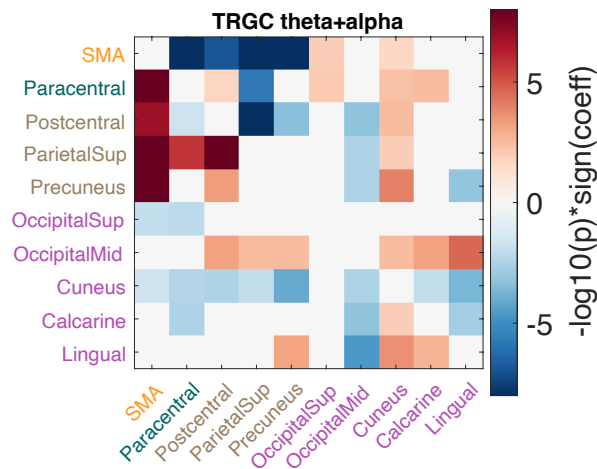

**Figure S2. Comparison of EEG markers between resting and walking conditions in the theta-alpha band.** Changes in directed functional connectivity were estimated by time-reversed Granger causality (TRGC). Red colors either indicate more information flow from the ROI on the Y-axis to the ROI on the X-axis in walking compared to resting, or less information flow from the ROI shown on the X-axis to the ROI shown on the Y-axis. We show  $\log_{10} p$ -values, thus values below -2 and above 2 would indicate significance at alpha level 0.01. Signed  $\log_{10} p$ -values that were not significant after FDR correction are set to zero.
